# Supplementary material
Source: PubMed Central journal article supplement (PMC1636540)

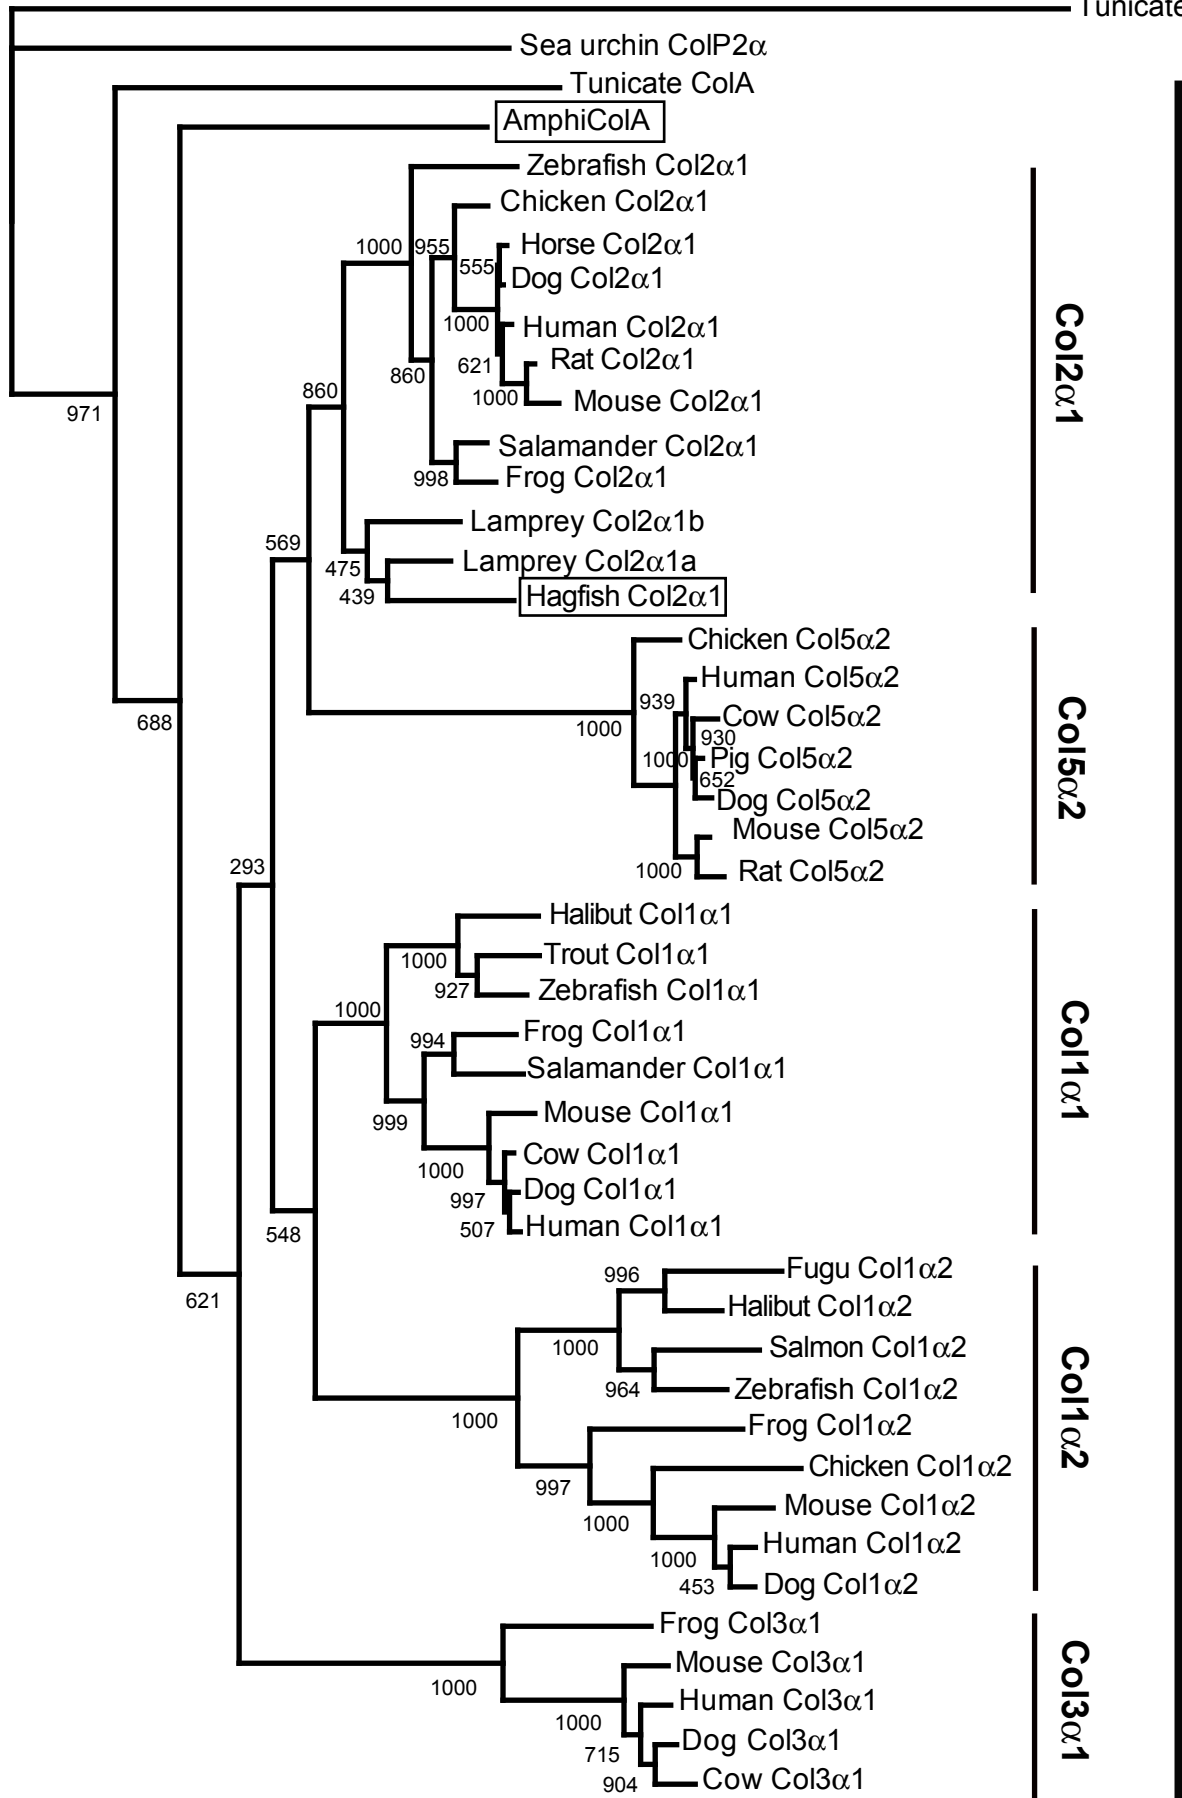

Supplement: pnas_0605630103_1.pdf [file pnas_0605630103_1.pdf]

Clade A fibril collagen

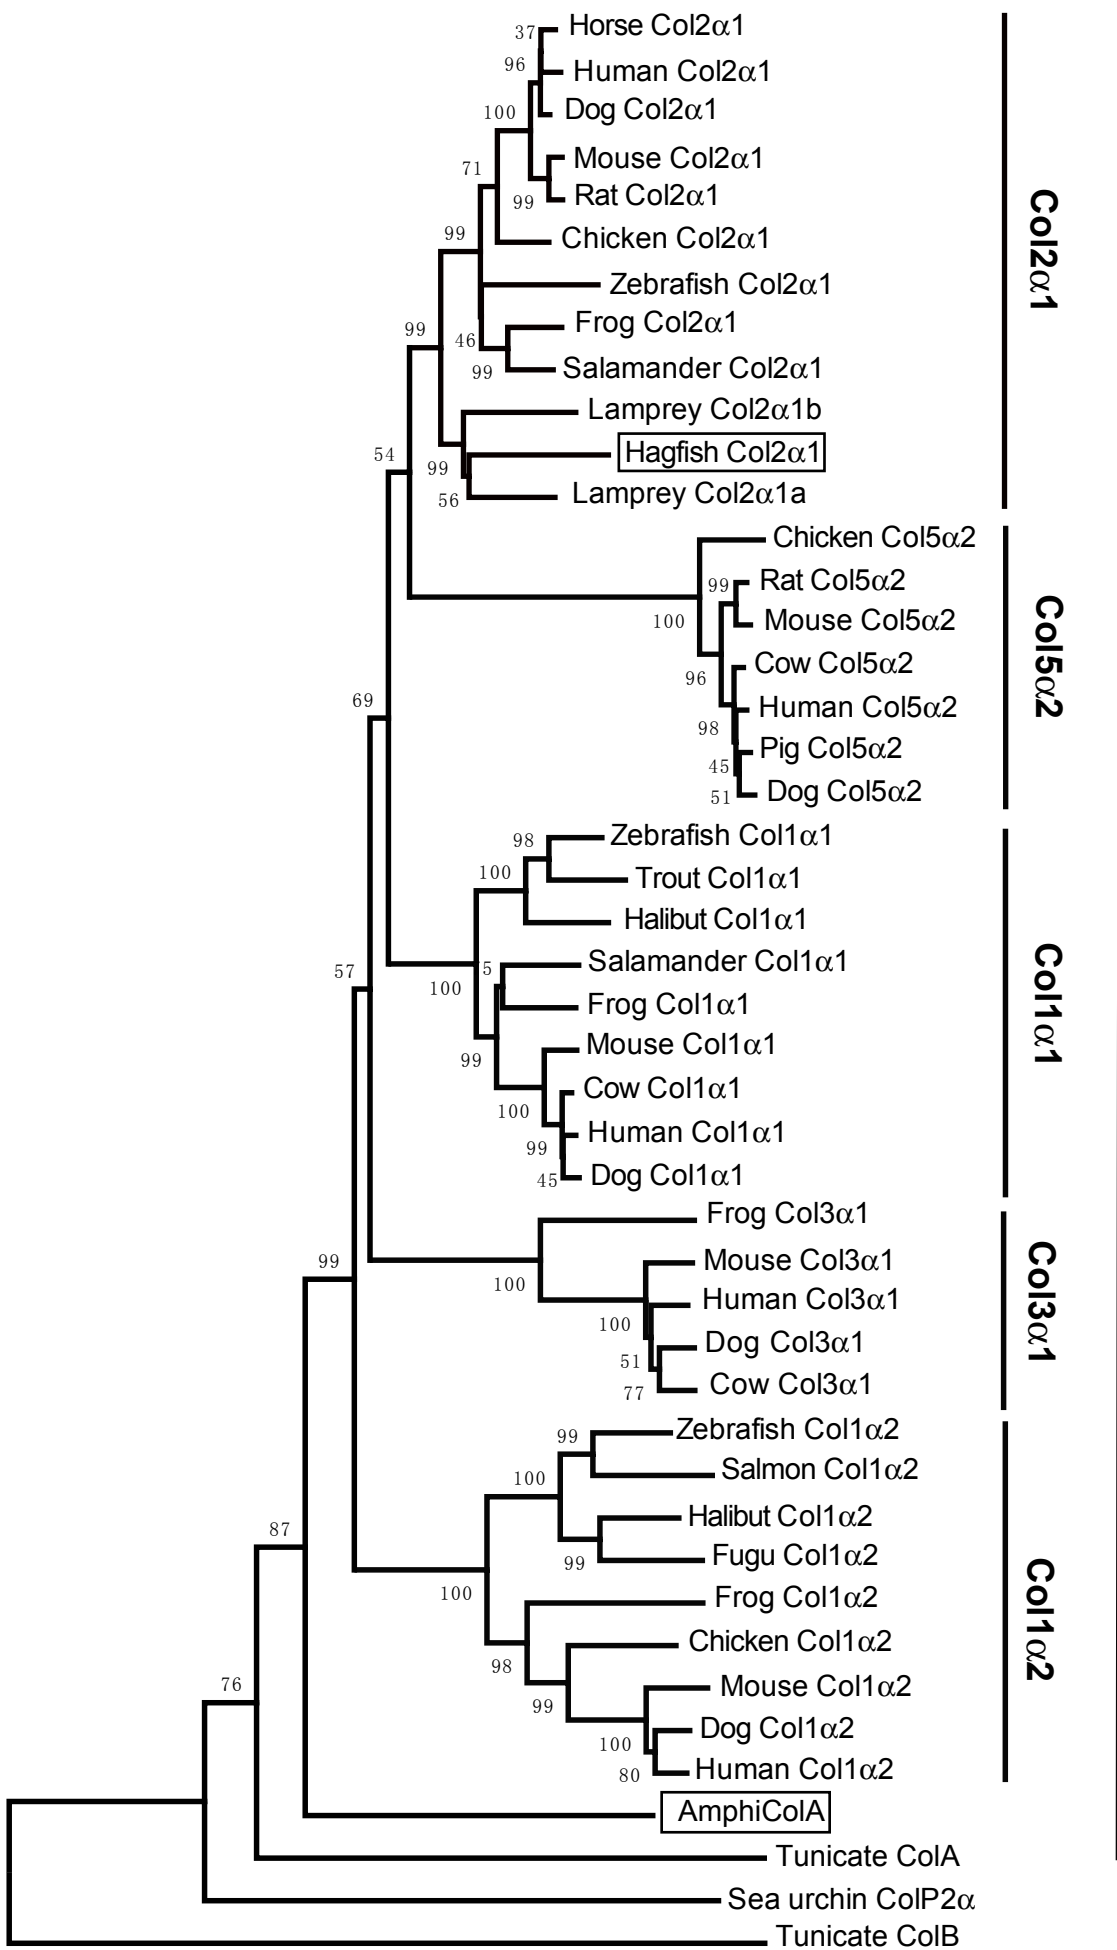

0.1

Supplement: pnas_0605630103_2.pdf [file pnas_0605630103_2.pdf]

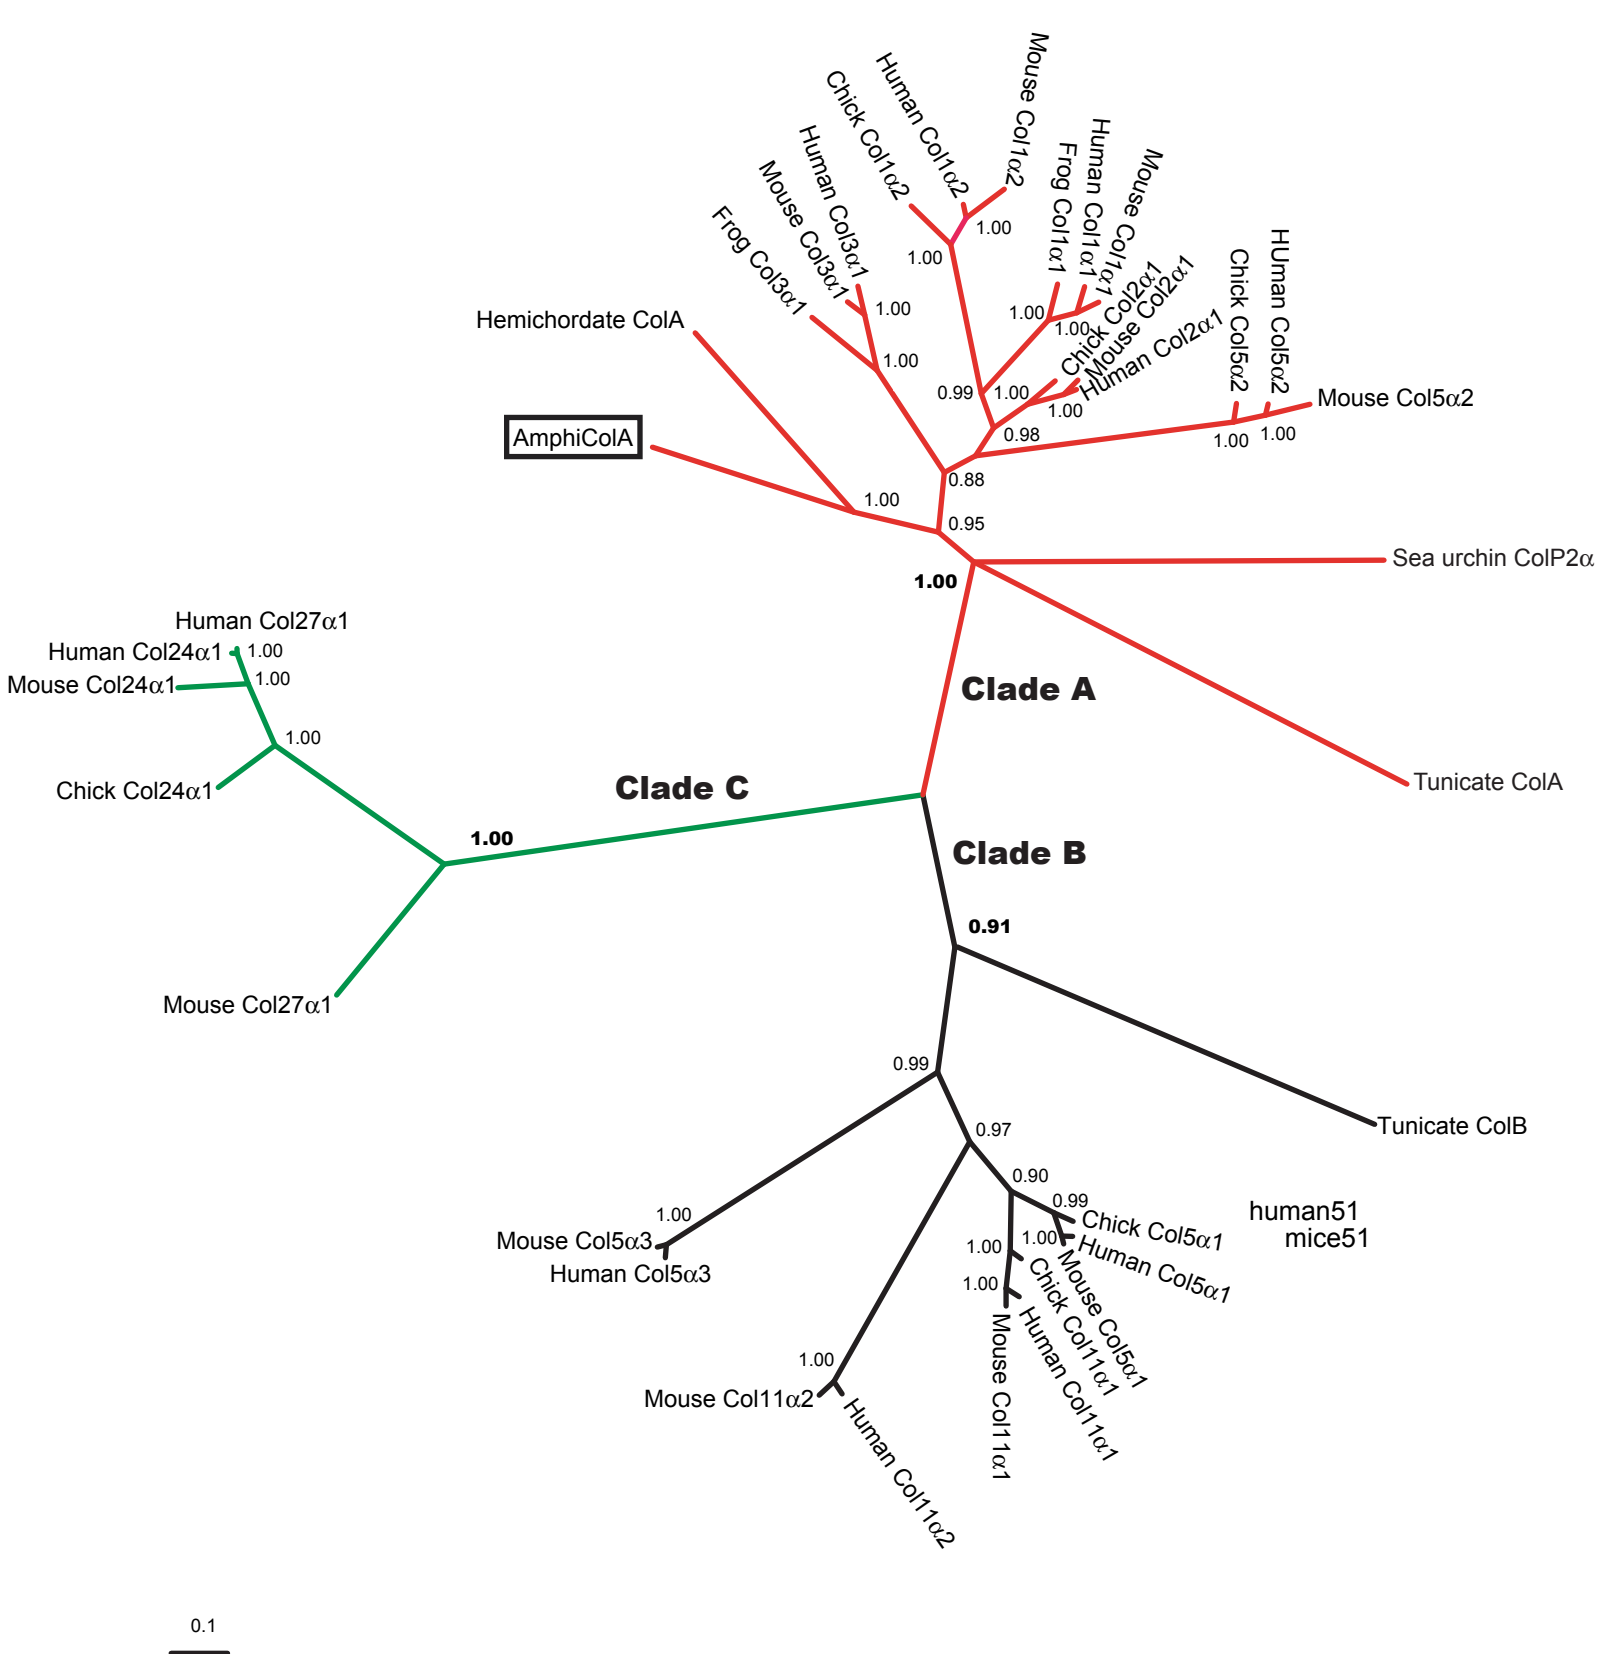

Supplement: pnas_0605630103_3.pdf [file pnas_0605630103_3.pdf]
